# Supplementary material for: Superior high-temperature capacitive energy storage performance enabled by in situ grown nanodots in polymer nanocomposites
Source: Royal Society of Chemistry journal article supplement (doi:10.1039/d5ee06723e), 2025-12-22
Supplement: d5ee06723e1.pdf [file d5ee06723e1.pdf]

## Supplementary Information

### **Superior High-Temperature Capacitive Energy Storage Performance Enabled by *In Situ* Grown Nanodots in Polymer Nanocomposites**

*Yanzhi Li,<sup>a</sup> Yuhan Chen,<sup>a</sup> Zhiyuan Li,<sup>a</sup> Yuxin Cui,<sup>a</sup> Lu Cheng,<sup>a</sup> Ke Cao,<sup>b</sup> Ying Han,<sup>c</sup> Wenfeng Liu,<sup>a\*</sup> and Yao Zhou<sup>a\*</sup>*

<sup>a</sup> State Key Laboratory of Electrical Insulation and Power Equipment, School of Electrical Engineering, Xi'an Jiaotong University, Xi'an, 710049, China

<sup>b</sup> School of Advanced Materials and Nanotechnology, Xidian University, Xi'an 710126, China

<sup>c</sup> Tianjin Key Laboratory of Advanced Joining Technology, School of Materials Science and Engineering, Tianjin University, Tianjin 300350, China

E-mail: [liuwenfeng@xjtu.edu.cn](mailto:liuwenfeng@xjtu.edu.cn), [zhouyao@xjtu.edu.cn](mailto:zhouyao@xjtu.edu.cn)

## Experimental

### Materials

4,4'-(4,4'-isopropylidenediphenoxy) diphthalic anhydride (BPADA), 4,4'-diaminodiphenyl sulfone (DDS), tantalum ethoxide ( $\text{Ta}(\text{OC}_2\text{H}_5)_5$ ), and anhydrous *N*-methyl-2-pyrrolidone (NMP, 99.5%) were purchased from Sigma-Aldrich.  $\text{Ta}_2\text{O}_5$  nanoparticles ( $\text{Ta}_2\text{O}_5$ -NP, ~100 nm) were obtained from Aladdin. Commercial films of BOPP, PI (Kapton), and PEI (Ultem) were supplied by PolyK Technology.

### Materials synthesis and film preparation

The *in situ* constructed SPEI/TaO nanocomposites were synthesized through three steps: pre-polymerization, co-polymerization, and thermal imidization. In the pre-polymerization step, DDS (124 mg, 0.5 mmol) and BPADA (260 mg, 0.5 mmol) were dissolved in NMP (3.5 mL) and stirred at room temperature for 12 h to form a viscous solution of sulfonated poly(ether amide acid) (SPEAA). For co-polymerization, SPEAA was copolymerized with  $\text{Ta}(\text{OC}_2\text{H}_5)_5$  using a site-isolation strategy.  $\text{Ta}(\text{OC}_2\text{H}_5)_5$  was dissolved in NMP (7 mL), while the required amount of water was dissolved in an additional 3.5 mL of NMP. The SPEAA/NMP,  $\text{Ta}(\text{OC}_2\text{H}_5)_5$ /NMP, and water/NMP solutions were mixed and stirred at room temperature for 1 h. The amounts of  $\text{Ta}(\text{OC}_2\text{H}_5)_5$  and water were calculated according to:

$$m_{\text{Ta}(\text{OC}_2\text{H}_5)_5} = \frac{m_{\text{SPEI}}}{\rho_{\text{SPEI}}} \times \frac{V_{\text{Ta}_2\text{O}_5(\text{vol}\%)}}{M_{\text{Ta}_2\text{O}_5}} \times \rho_{\text{Ta}_2\text{O}_5} \times 2 \times M_{\text{Ta}(\text{OC}_2\text{H}_5)_5}$$
$$m_{\text{H}_2\text{O}} = \frac{m_{\text{Ta}(\text{OC}_2\text{H}_5)_5}}{M_{\text{Ta}(\text{OC}_2\text{H}_5)_5}} \times 5 \times M_{\text{H}_2\text{O}}$$

where  $\rho_{\text{Ta}_2\text{O}_5}$  and  $\rho_{\text{SPEI}}$  are the densities of  $\text{Ta}_2\text{O}_5$  (8.20 g cm<sup>-3</sup>) and SPEI (1.30 g cm<sup>-3</sup>), respectively;  $M_{\text{Ta}(\text{OC}_2\text{H}_5)_5}$ ,  $M_{\text{Ta}_2\text{O}_5}$ , and  $M_{\text{H}_2\text{O}}$  are the molecular weights of  $\text{Ta}(\text{OC}_2\text{H}_5)_5$  (406.25 g mol<sup>-1</sup>),  $\text{Ta}_2\text{O}_5$  (441.89 g mol<sup>-1</sup>), and water (18.02 g mol<sup>-1</sup>), respectively;  $m_{\text{Ta}(\text{OC}_2\text{H}_5)_5}$ ,  $m_{\text{SPEI}}$ , and  $m_{\text{H}_2\text{O}}$  are the weights of  $\text{Ta}(\text{OC}_2\text{H}_5)_5$ , S-PEI, and water, respectively; and  $V_{\text{Ta}_2\text{O}_5(\text{vol}\%)}$  is the desired volume fraction of  $\text{Ta}_2\text{O}_5$  in the nanocomposites. In the thermal imidization step, precursor solutions were drop-cast onto pre-cleaned glass slides and dried at 70 °C for 7 h to remove solvent. The films were then heated sequentially at 150 °C for 1 h, 220 °C for 2 h, and 270 °C for 1 h to complete imidization. After cooling, the films were peeled off by soaking in deionized water and subsequently vacuum-dried at 150 °C for 4 h.

For comparison, SPEI/TaO-NP films were fabricated by dispersing commercial  $\text{Ta}_2\text{O}_5$  nanoparticles into the SPEAA/NMP solution via ultrasonication, followed by the same thermal imidization protocol. Typical films thickness was ~10 μm. Gold electrodes (~60 nm thick) were

sputtered onto both sides of the films using a Quorum Q150R S Plus magneton sputter coater. Electrode diameters were 10 mm for dielectric spectroscopy, and 3 mm for conduction current, electrical breakdown, *D-E* loop, charge–discharge cycling, and fast discharge measurements.

### ***Structural characterization***

Fourier transform infrared (FTIR) spectra were collected in attenuated total reflectance (ATR) mode on a Shimadzu IRprestige-21. X-ray photoelectron spectroscopy (XPS) was carried out using a ULVAC-PHI Genesis 500. X-ray fluorescence (XRF) spectra were acquired with a MEGREZ- $\alpha$  spectrometer. Scanning electron microscopy (SEM) was performed on a ZEISS Sigma 360, with cross-sectional samples fractured in liquid nitrogen and coated with ~5 nm of gold. Transmission electron microscopy (TEM) was conducted on a Thermo Fisher Talos F200X. Differential scanning calorimetry (DSC) was measured using a TA Instrument Discovery 250 from 30 °C to 300 °C at 10 °C min<sup>-1</sup> under nitrogen. Mechanical tests were performed on samples (3 mm × 40 mm) stretched at 2.0 mm min<sup>-1</sup>, and Young's modulus was obtained from the slope at 0.5% strain.

### ***Electrical characterization***

Frequency- and temperature-dependent dielectric spectra were measured using a Keysight 4980AL LCR meter with a Sun Electronics Systems EC1A chamber. Conduction current was recorded using a Keithley 6517A electrometer under controlled electric fields (Stanford PS350) and temperatures (Sun Electronics Systems EC1A chamber). Electrical breakdown strength was measured using a Trek 610C amplifier with a voltage ramp rate of 500 V s<sup>-1</sup>. Each sample was tested at least 15 times and analyzed using two-parameter Weibull distribution. *D-E* loops were obtained using a modified Sawyer-Tower circuit (PolyK PK-FERRO20B) with a unipolar triangle voltage at 100 Hz. Charging–discharge cycling was performed using the same system in fatigue mode. Fast discharge tests were carried out using a PolyK PK-CPR1502 and a Trek 10/10B high-voltage amplifier, and the charged samples were discharged through a 20 k $\Omega$  noninductive resistor via a high-speed MOSFET switch. The discharge time  $t_{90\%}$  is defined as the time to release 90% of the stored energy ( $U_{90\%}$ ), and power density is calculated as  $U_{90\%}/t_{90\%}$ . Thermally stimulated depolarization current (TSDC) was measured using a Keithley 6517A with a Sun Electronics EC1A oven. Samples were polarized at 25 MV m<sup>-1</sup> and 230 °C for 30 min, rapidly cooled to -50 °C under electric bias. After stabilizing at -50 °C for 3 min, the samples were short-circuited for 1 min. Finally, the samples were heated to 300 °C at 3 °C min<sup>-1</sup> while recording current. For electrical breakdown, *D-E* loop, and fast discharge tests, samples were immersed in dimethylsiloxane (Dow Corning) with temperature controlled by a hot plate and monitored with a sensor.

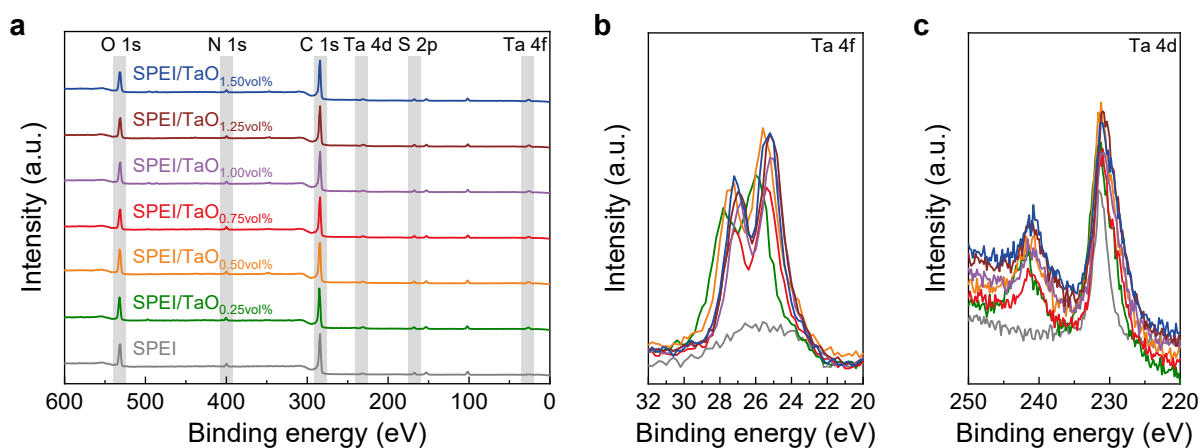

**Figure S1.** a) XPS survey spectra of SPEI/TaO. b) High-resolution Ta 4f spectra and c) Ta 4d spectra, confirming the successful incorporation of Ta<sub>2</sub>O<sub>5</sub> into the nanocomposites.

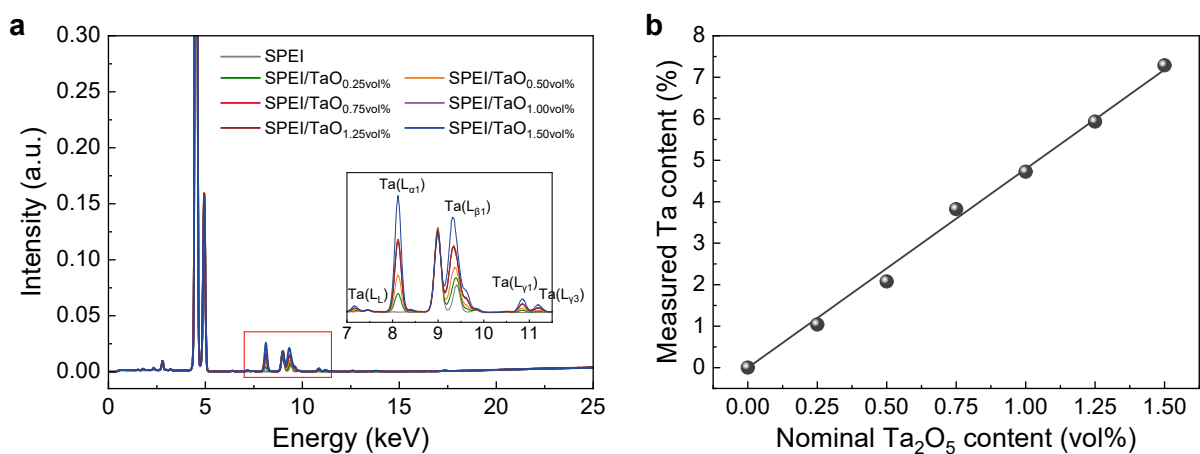

**Figure S2.** a) XRF spectra of SPEI/TaO. b) Measured Ta content from XRF versus nominal Ta<sub>2</sub>O<sub>5</sub> nanodot content. The black line shows the linear fit, demonstrating excellent agreement between the actual and targeted filler loadings.

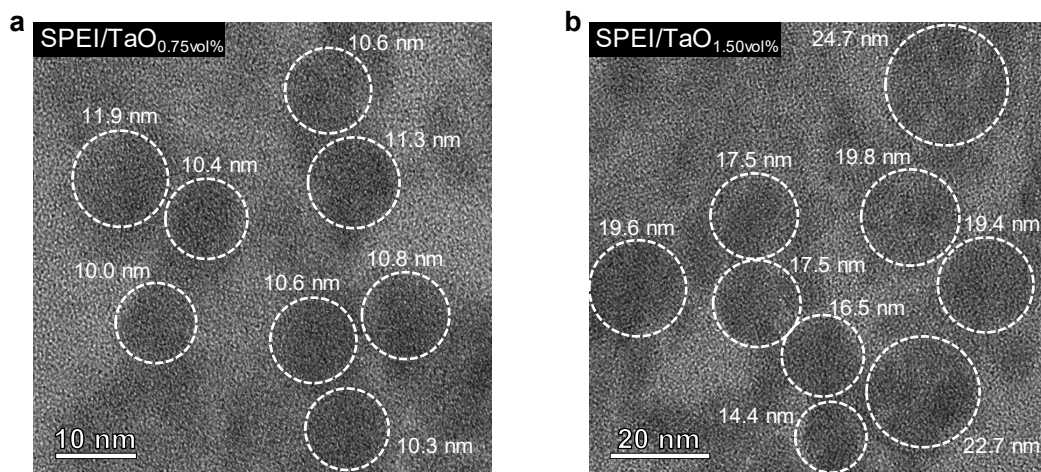

**Figure S3.** TEM images of SPEI/TaO containing (a) 0.75 vol% and (b) 1.50 vol% Ta<sub>2</sub>O<sub>5</sub> nanodots.

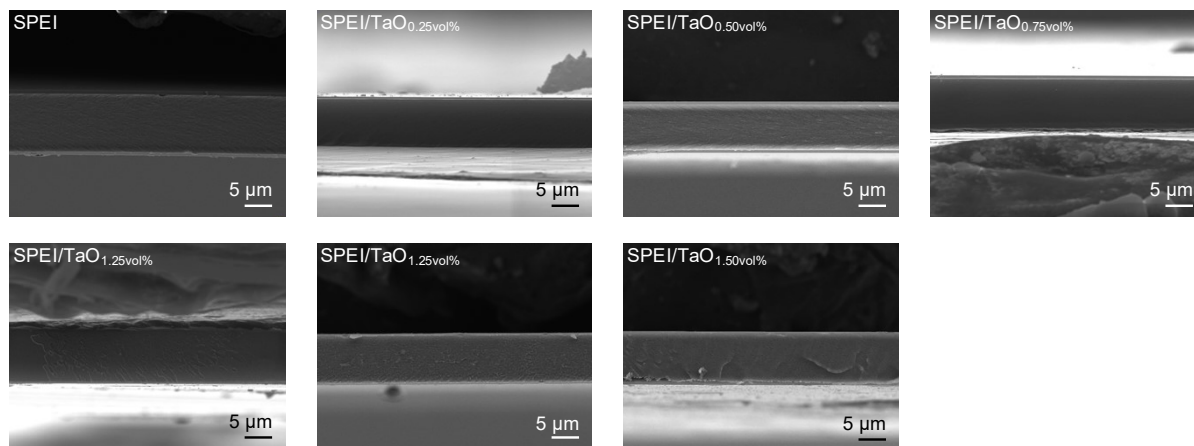

**Figure S4.** Cross-sectional SEM images of SPEI/TaO, confirming uniform morphology and consistent film thickness.

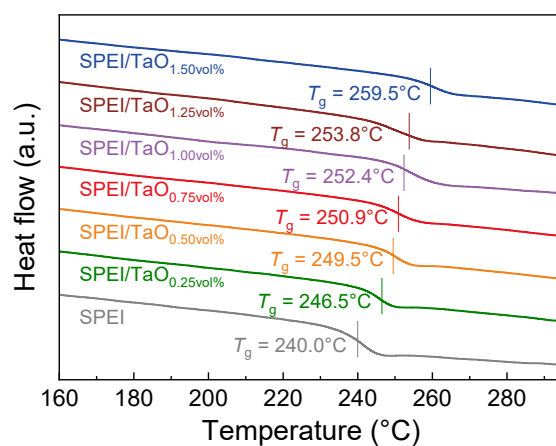

**Figure S5.** DSC curves of SPEI/TaO<sub>5</sub>, showing an increase in glass transition temperature with increasing Ta<sub>2</sub>O<sub>5</sub> nanodot content.

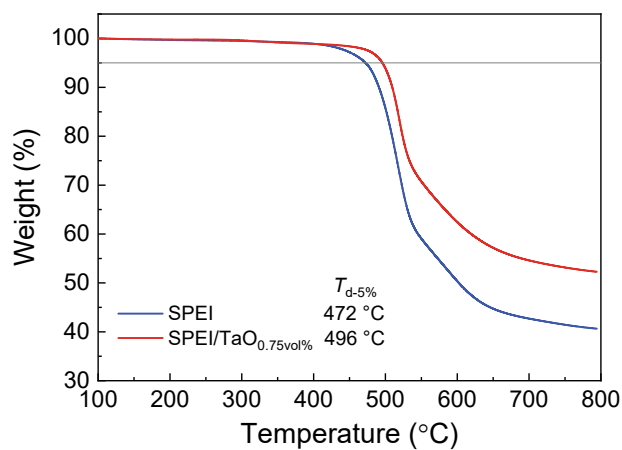

**Figure S6.** Thermal decomposition temperatures ( $T_{d-5\%}$ , defined as the temperature at 5% weight loss) derived from thermogravimetric analysis of SPEI/TaO<sub>5</sub> 0.75vol% and SPEI.

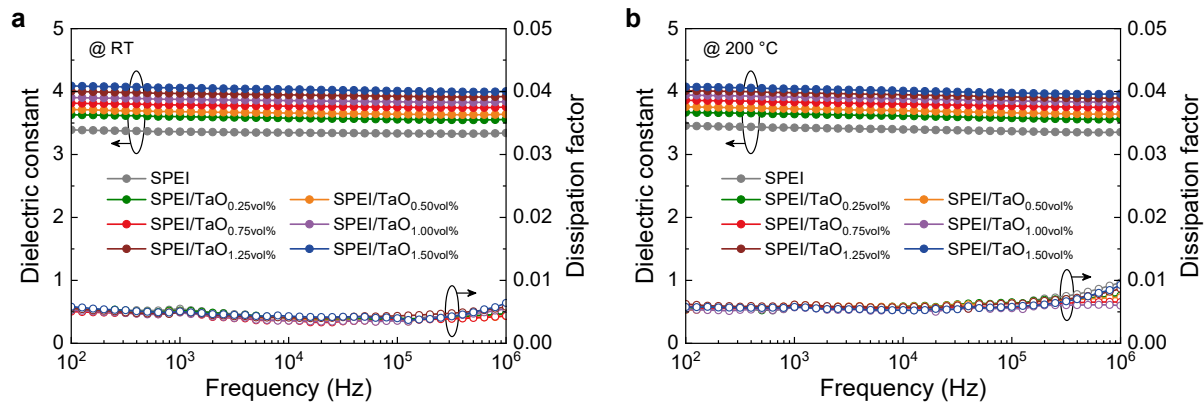

**Figure S7.** Frequency-dependent dielectric constant and dissipation factor of SPEI/TaO measured at (a) room temperature and (b) 200 °C.

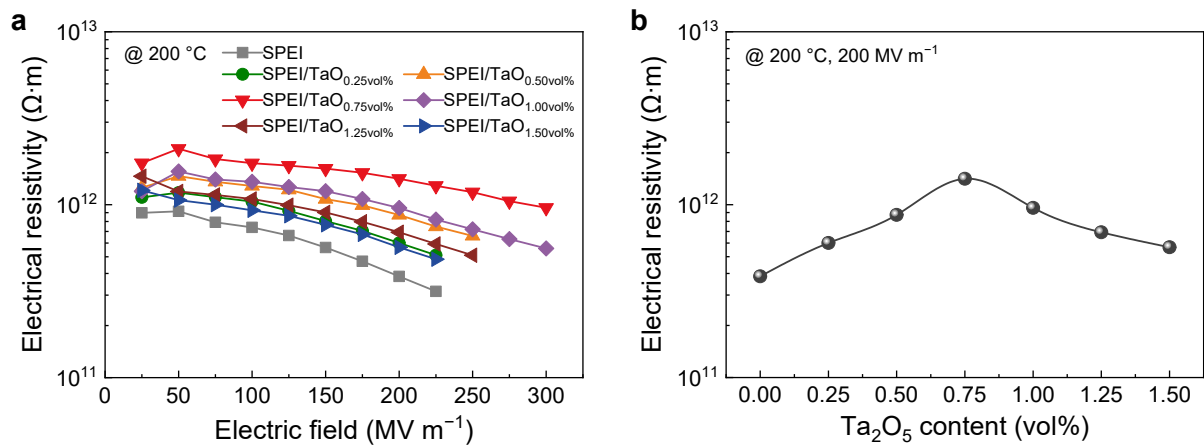

**Figure S8.** (a) Electric field-dependent resistivity of SPEI/TaO at 200 °C. (b) Electrical resistivity of SPEI/TaO as a function of Ta<sub>2</sub>O<sub>5</sub> nanodot content at 200 °C and 200 MV m<sup>-1</sup>.

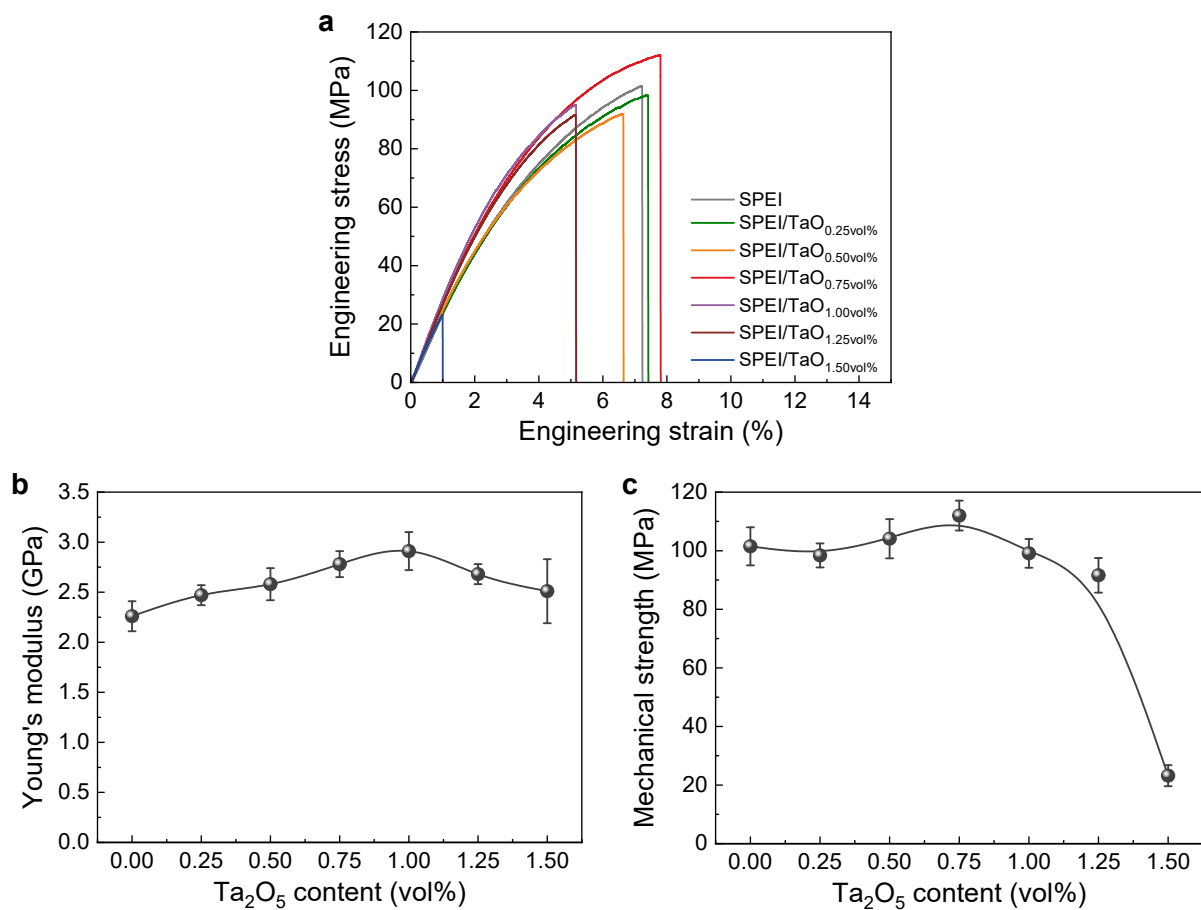

**Figure S9.** (a) Engineering stress-strain curves of SPEI/TaO. (b) Young's modulus and (c) mechanical strength of SPEI/TaO as a function of Ta<sub>2</sub>O<sub>5</sub> nanodot content.



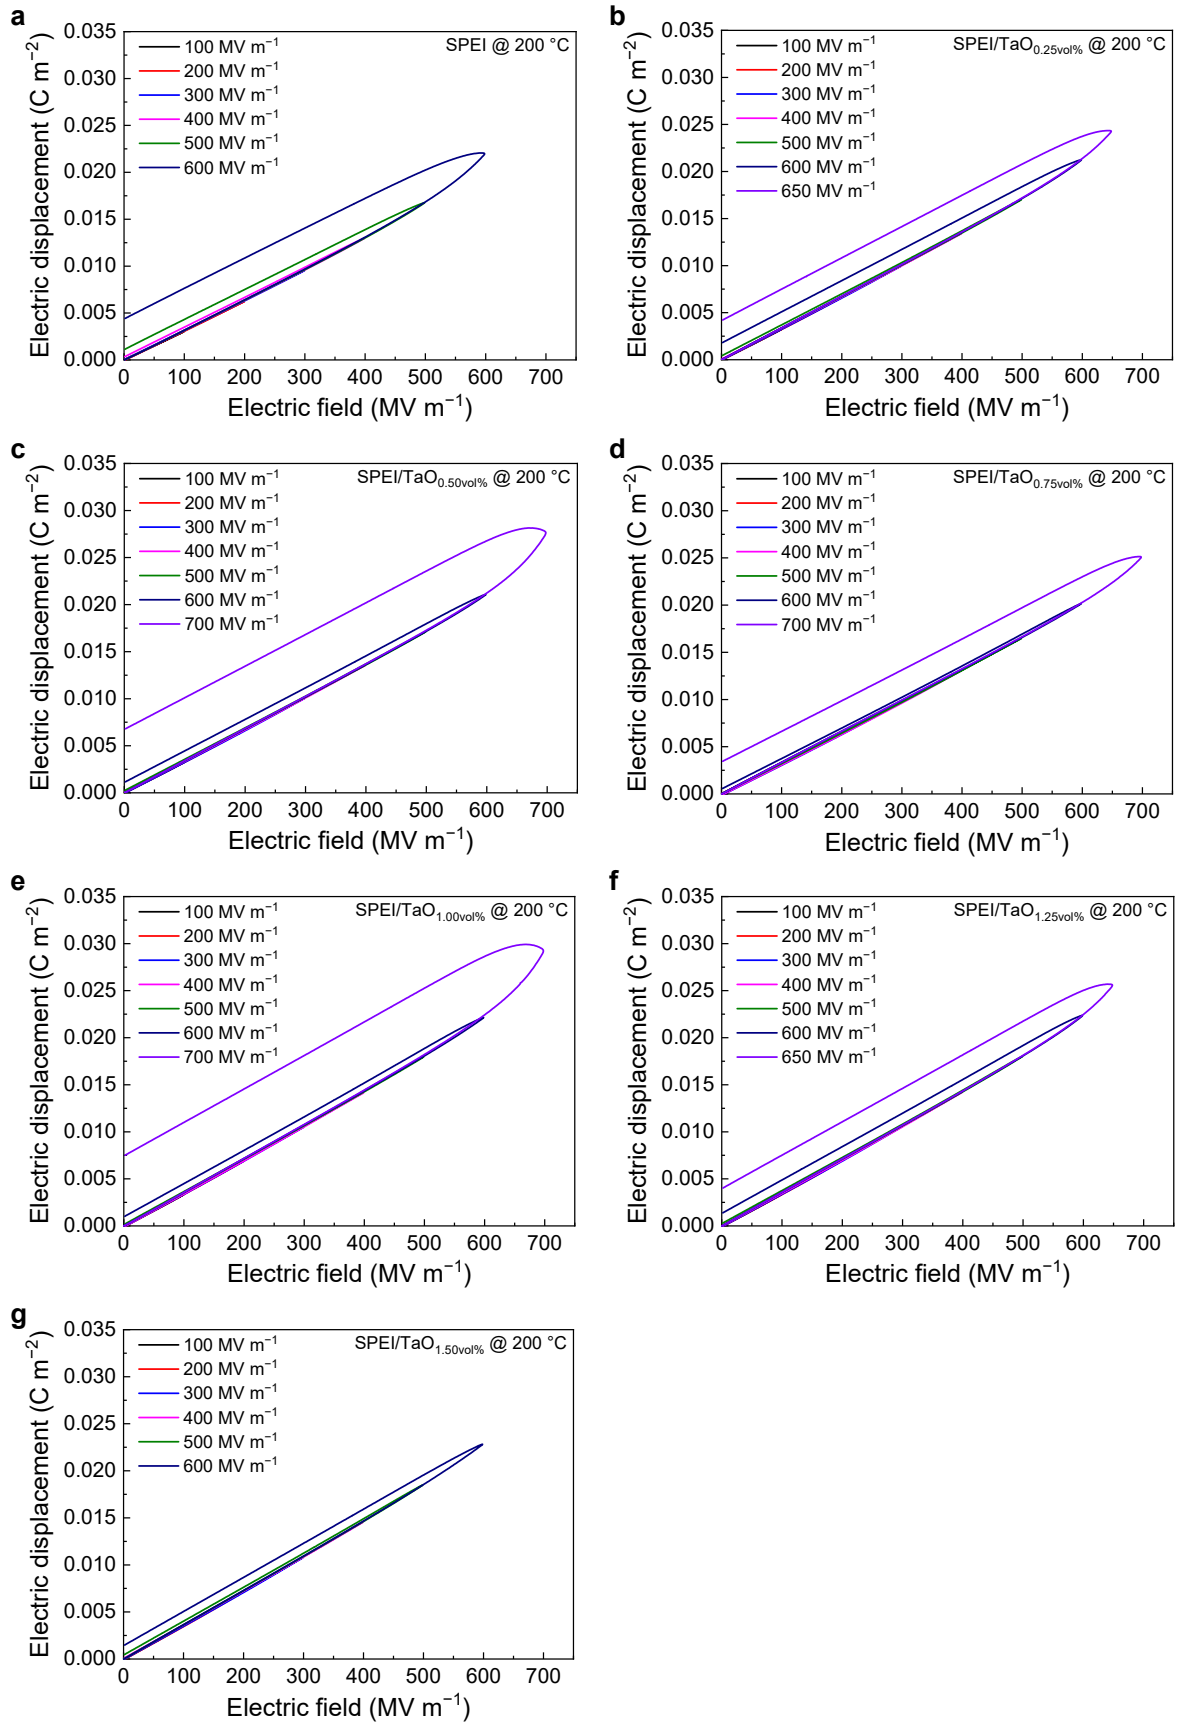

**Figure S10.** Unipolar  $D-E$  loops of (a) SPEI, (b) SPEI/TaO<sub>0.25vol%</sub>, (c) SPEI/TaO<sub>0.50vol%</sub>, (d) SPEI/TaO<sub>0.75vol%</sub>, (e) SPEI/TaO<sub>1.00vol%</sub>, (f) SPEI/TaO<sub>1.25vol%</sub>, and (g) SPEI/TaO<sub>1.50vol%</sub> measured at 200 °C.

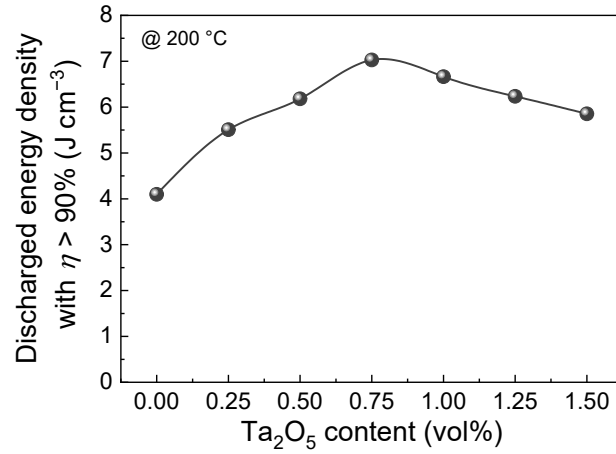

**Figure S11.** Discharged energy density of SPEI/TaO with efficiency above 90% at  $200^\circ\text{C}$  as a function of  $\text{Ta}_2\text{O}_5$  nanodot content.

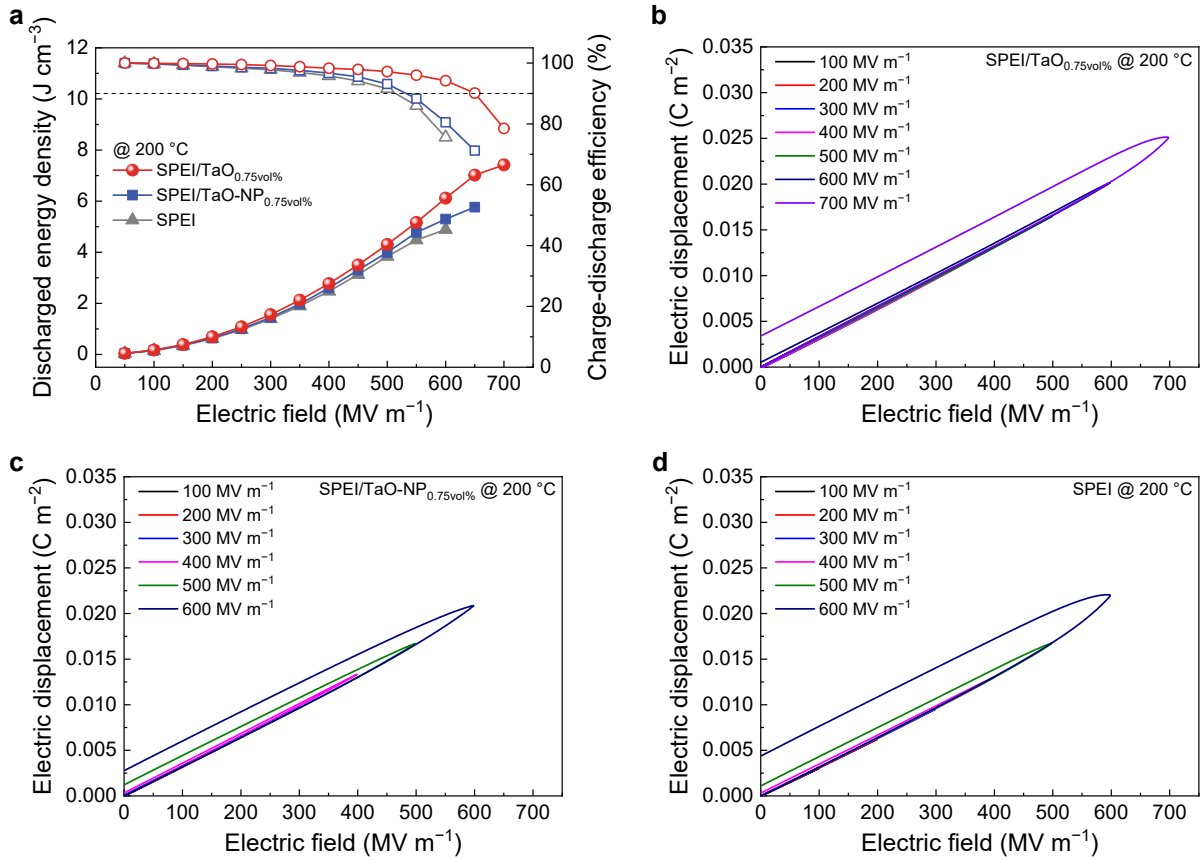

**Figure S12.** (a) Discharged energy density and charge-discharge efficiency, and the corresponding  $D$ - $E$  loops of (b) SPEI/TaO<sub>0.75vol%</sub>, (c) SPEI/TaO-NP<sub>0.75vol%</sub>, and (d) SPEI measured at  $200^\circ\text{C}$ .

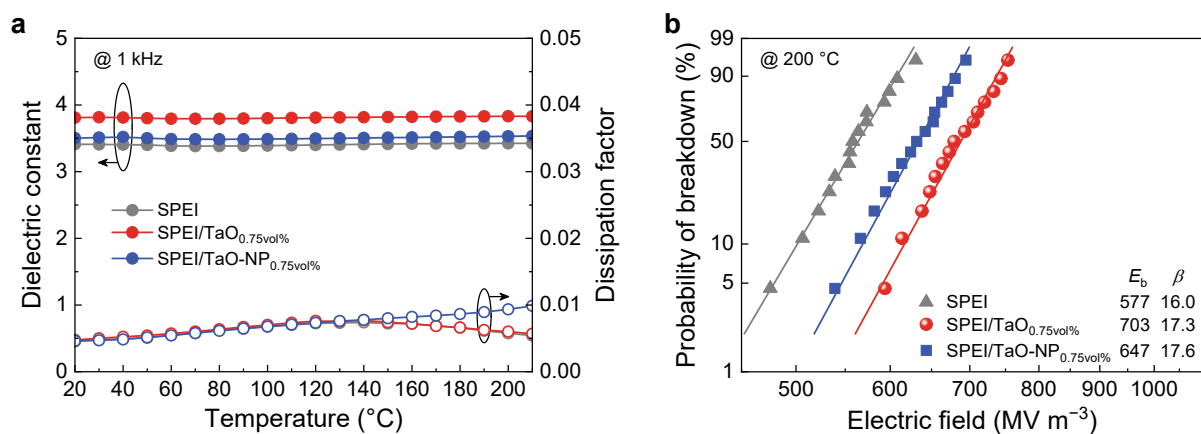

**Figure R13.** (a) Dielectric constant and dissipation factor, and (b) Weibull breakdown plots of *in situ* constructed SPEI/TaO<sub>0.75vol%</sub>, directly blended SPEI/TaO-NP<sub>0.75vol%</sub>, and SPEI measured at 200 °C.

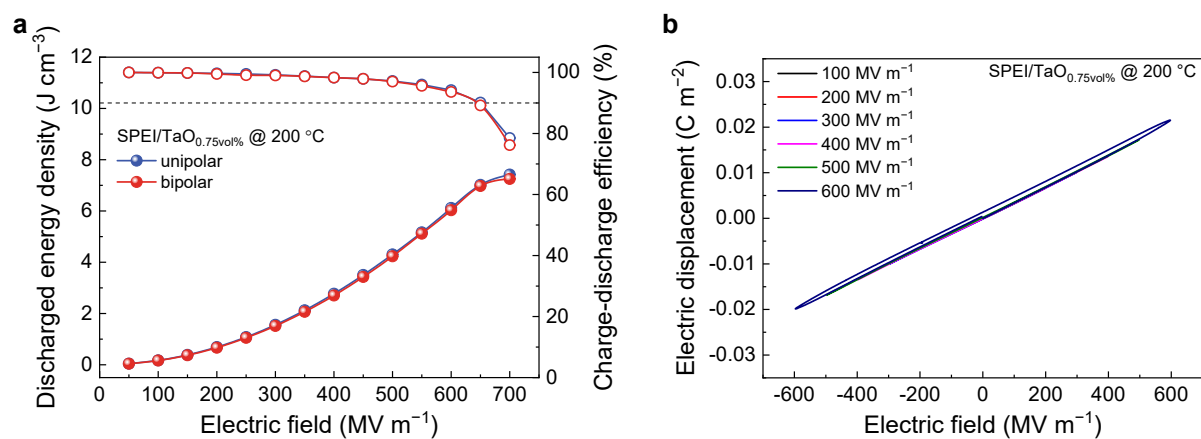

**Figure S14.** (a) Bipolar *D-E* loops and (b) the corresponding discharged energy density and charge–discharge efficiency of SPEI/TaO<sub>0.75vol%</sub> at 200 °C.

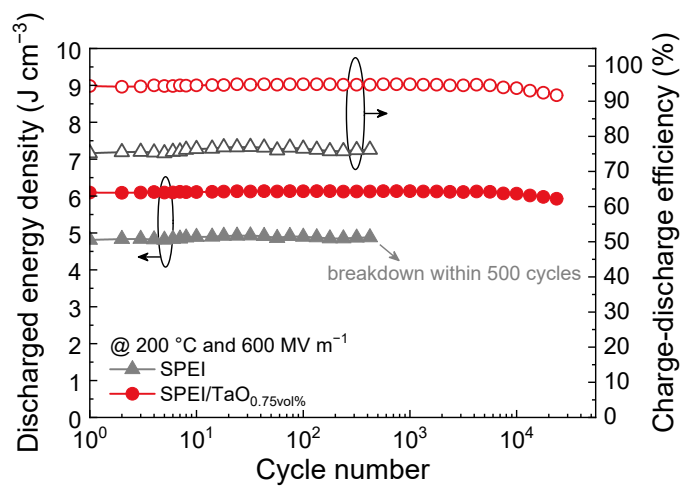

**Figure S15.** Charge–discharge cycling performance of SPEI and SPEI/TaO<sub>0.75vol%</sub> at 200 °C and 600 MV m<sup>-1</sup>.

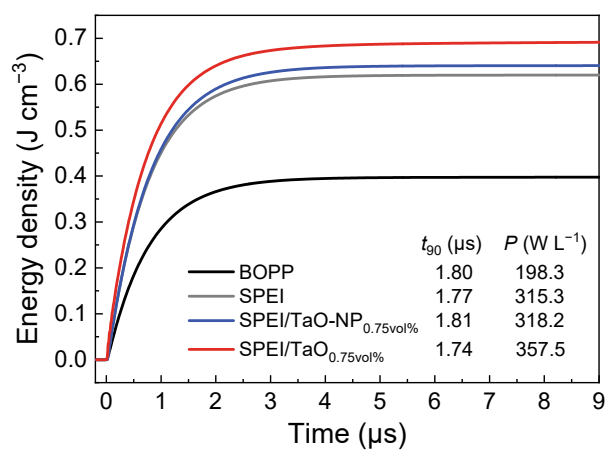

**Figure S16.** Discharged energy density versus discharge time for BOPP at 105 °C, and for SPEI, directly blended SPEI/TaO-NP<sub>0.75vol%</sub>, and *in situ* constructed SPEI/TaO<sub>0.75vol%</sub> at 200 °C.

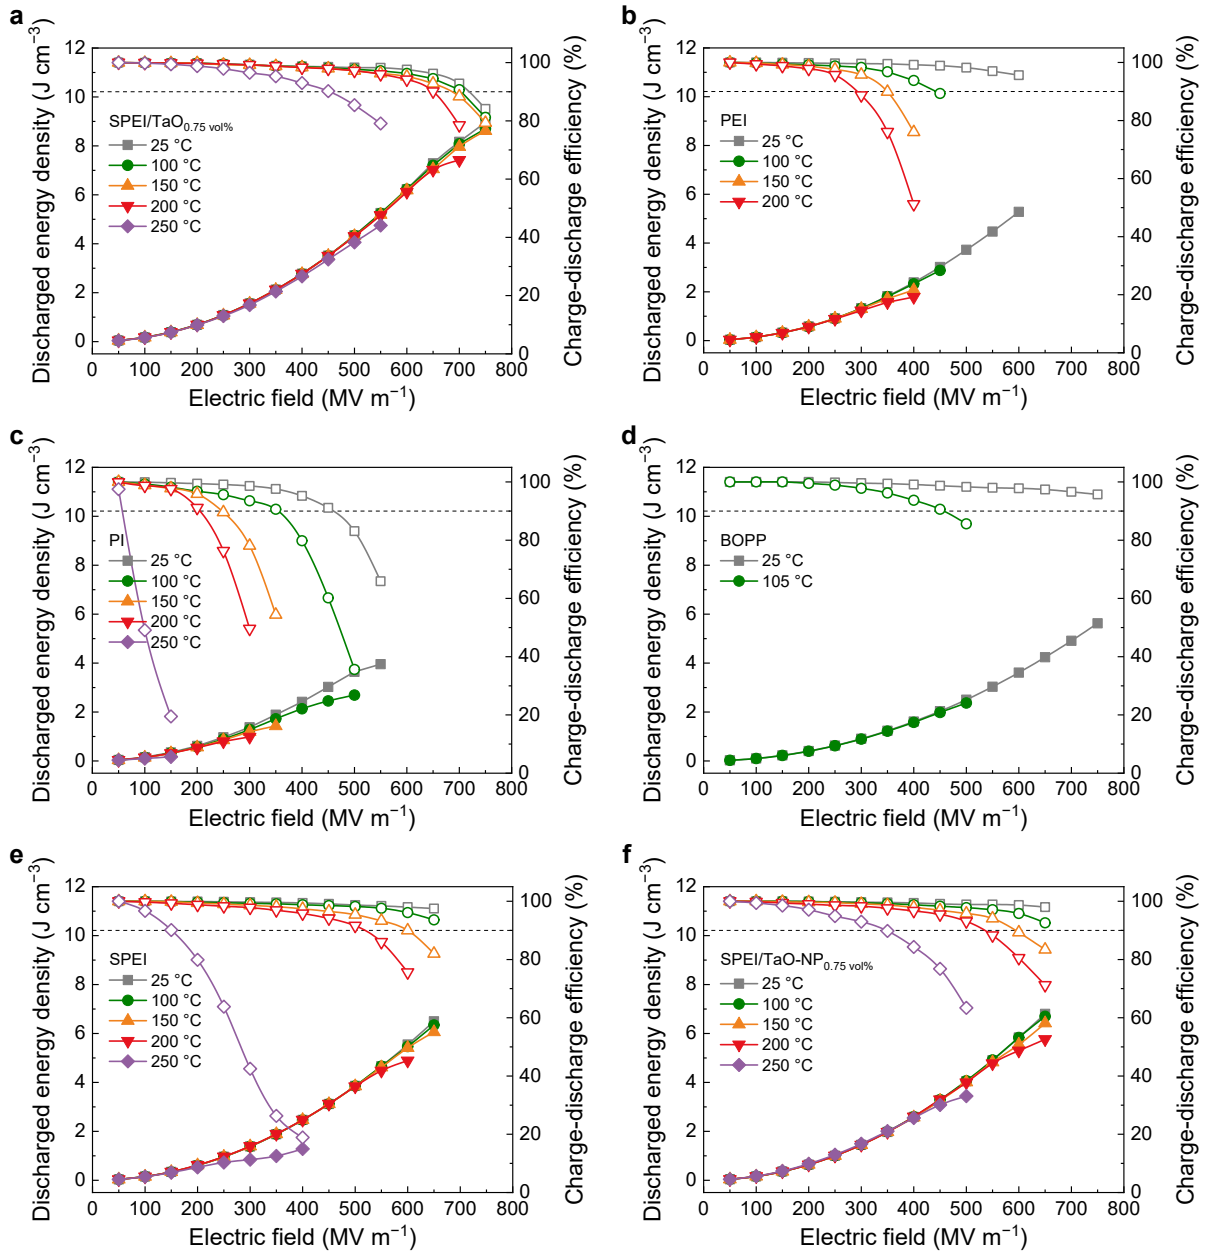

**Figure S17.** Discharged energy density and charge-discharge efficiency of (a) SPEI/TaO<sub>0.75</sub>vol%, (b) PEI, (c) PI, (d) BOPP, (e) SPEI, and (f) SPEI/TaO-NP<sub>0.75</sub>vol% measured at different temperatures.

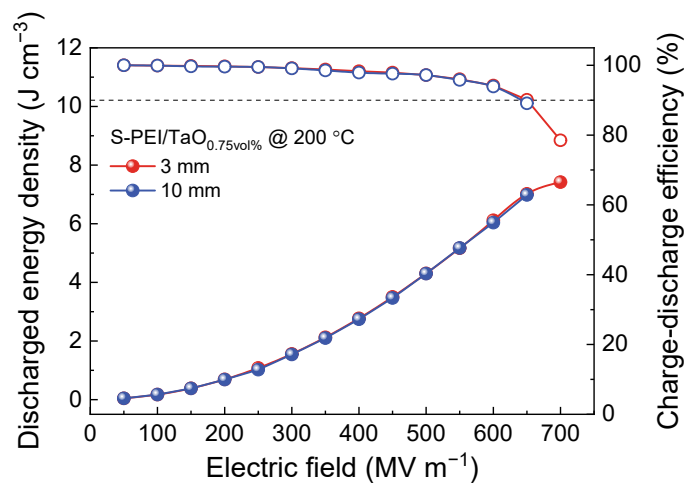

**Figure S18.** Discharged energy density and charge–discharge efficiency of SPEI/TaO<sub>0.75vol%</sub> measured with different electrode areas at 200 °C.

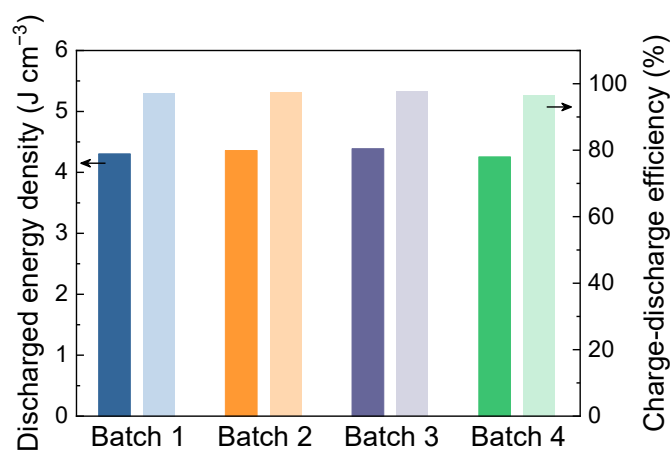

**Figure S19.** Discharged energy density and charge–discharge efficiency of different batches of SPEI/TaO<sub>0.75vol%</sub> measured at 200 °C and 500 MV m<sup>-1</sup>.

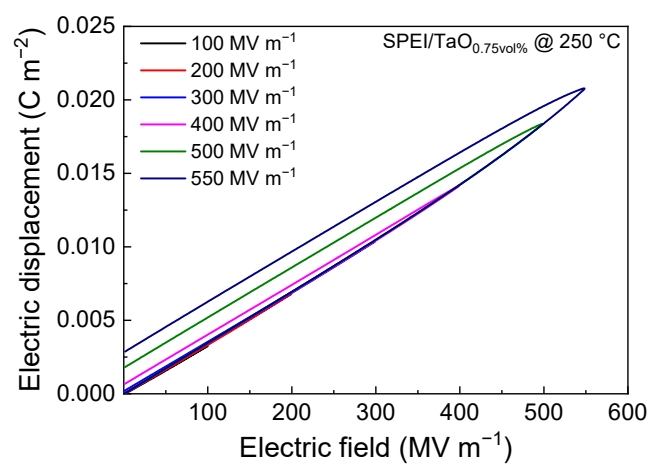

**Figure S20.** Unipolar  $D$ - $E$  loops of SPEI/TaO<sub>0.75vol%</sub> measured at 250 °C.
